# Supplementary material for: A Spatiotemporal Characterisation of Redox Molecules in Planarians, with a Focus on the Role of Glutathione during Regeneration
Source: MDPI journal article supplement (doi:10.3390/biom11050714), 2021-05-11
Supplement: s1 [file s1]

## Supplemental files

### S2 Primer sequences

**Table S1 –Sequences of qPCR primers**

| Gene             | Forward primer (5'-3')   | Reverse primer (5'-3')  |
|------------------|--------------------------|-------------------------|
| <i>gapdh</i>     | GCAAAACATTATTCCGGCTTC    | GCACTGGAAGCTCTAAAGGCCA  |
| <i>β-actin</i>   | AGAACAGCTTCAGCCTCGTCA    | ITGGAATAGTGCTTCTGGGCAT  |
| <i>rpl13</i>     | AGGTGTCCCAGCTCCTTATGA    | GGCCCAATTGACAGAATTTTC   |
| <i>gm2ap</i>     | CCGTCAGATTAAAGCTCGGTT    | TTTCGGACATTGTTACCCAT    |
| <i>gst</i>       | CACCAGAAGAGAAGAAAGAAGAAC | TTTTCTCCAGCGAAAAATCC    |
| <i>Cu-Zn-sod</i> | TTCATGCTGTATGCGTTTTG     | AACCGTGTTTACCAGGAGTTAGA |
| <i>Mn-sod</i>    | TGGGCTTGGTTAGGGTTGAA     | AACGTCAAATCCTAGCAACGG   |

**Table S2 –Sequences of primers used to generate RNAi probes**

| Gene             | Forward primer (+ T7)  | Reverse primer (+ T7) |
|------------------|------------------------|-----------------------|
| <i>gst</i>       | GAGCTGAACTGATTGACTGG   | TGTCATCTTCTCCCATGAACC |
| <i>Cu-Zn-sod</i> | AGTTCATGCTGTATGCGTTTTG | GCTAGTTTCGTGGCCTCCTT  |
| <i>Mn-sod</i>    | GCAATGCAAAATGCAATAAGA  | CCATGTGCAATCTCCAAAA   |
| <i>H2B</i>       | AAGATCGCTGCTAAGTCTGTT  | CGTGTTAGCCAATTCTCCT   |

**Table S3 –Sequences of primers used to generate *in situ* probes**

| Gene             | Forward primer        | Reverse primer (+ T7)   |
|------------------|-----------------------|-------------------------|
| <i>gst</i>       | GGCCAGAAGTGAAACCAAC   | GGACGAGTATTAACCCATTCTTC |
| <i>gr</i>        | TCGGATTAGCTGAGGAGGAC  | CGATCAAAGCACACACGAAG    |
| <i>Cu-Zn-sod</i> | ACGAATTTGGCGACAATACAA | CCCACACGCTAATCGACCAC    |
| <i>Mn-sod</i>    | GCACTGGAGCATCAATATC   | CAAATCCTAGCAACGGCTTC    |
| <i>cat</i>       | CCCACACCTTCAAATTGGTC  | GGTCAACGTCGCCAGTAAG     |
| <i>trx</i>       | CCGATAGCGACCTGGATG    | GCTGCTCAAAATGATTGCTC    |
| <i>smedwi-1</i>  | GTGACGCAGAGAAACGGAAG  | TTGGATTAGCCCCATCTTTG    |
| <i>NB21.11e</i>  | GTGATTGCGTTCGCGTATATT | ATTATCCAGCGCGTCATATTC   |
