# Supplementary material for: A Spatiotemporal Characterisation of Redox Molecules in Planarians, with a Focus on the Role of Glutathione during Regeneration
Source: Biomolecules. 2021 May 11;11(5):714. doi: 10.3390/biom11050714 (PMC8150688; doi:10.3390/biom11050714)
Supplement: Supplementary file 1 [file biomolecules-11-00714-s001.zip › S1 Database search.xlsx]

## Sheet: Info
A spatiotemporal characterization of redox molecules in planarians, with a focus on the role of glutathione during regeneration
Karolien Bijnens*, Vincent Jaenen*, Annelies Wouters, Nathalie Leynen, Nicky Pirotte, Tom Artois, Karen Smeets
Supplemental information
S1 Database search

## Sheet: PlanMine
		Cu-Zn-sod	Mn-sod		gr	gst	gamma-gs
Transcript		dd_smed_v6_519_0_1	dd_smed_v6_1259_0_1		dd_Smed_v6_8743_0_1	dd_Smed_v6_20_0_1	dd_Smed_v6_6745_0_1
Blast sequence feature		SOD1, soluble (mus musculus)	SOD2, mitochondrial (mus musculus)		Glutathione reductase (mus musculus)	hematopoietic prostanglandin D synthase (Homo sapiens)	Glutamate-cysteine ligase, catalytic subunit (Homo sapiens)
Cell populations
In adults	Xins (differentiated)	222.37	97.12		3.002	4020.83	20.54
	X2 (stem cell progeny)	709.26	140.56		7.59	37.025	16.93
	X1 (stem cells)	754.51	296.91		23.37	59.45	14.8
	sum	1686.14	534.59		33.962	4117.31	52.27
	Ratio	40.9525	12.984		0.82486	100	1.26952
2 dpa: SCs
in heads	X1	470.64	250.25		19.7	62.78	12.93
in tails	X1	420.42	234.31		18.34	37.56	10.56
Gene expression along A/P axis	AP01	231.616	111.246		5.546	2843.94	26.182
	AP02	254.725	118.085		7.022	5563.01	20.649
	AP03	264.852	114.047		7.268	6911.93	18.883
	AP04	278.082	124.916		9.034	8090.52	17.613
	AP05	260.868	117.909		8.088	8006.94	16.673
	AP06	259.063	115.066		8.854	7241.65	17.243
	AP07	256.825	110.36		8.066	6546.94	17.192
	AP08	269.391	120.628		9.062	8177.46	20.605
	AP09	283.731	119.506		9.961	7878.82	22.477
	AP10	272.06	115.653		8.392	7754.58	24.459
	AP11	249.1	115.142		9.177	6736.39	25.85
	Average	261.847	116.596		8.22455	6886.56	20.7115
Gene expression along M/L axis	AP_P	186.615	108.199		4.084	1184.69	10.838
	ML01	264.917	114.135		8.039	7015.49	14.042
	ML02	261.694	117.83		8.198	8832.78	17.29
	ML03	310.773	136.125		8.87	7047.36	20.23
	Average	256	119.072		7.29775	6020.08	15.6
Expression during regeration
head	0	0	0		0	0	0
	6	-2.101	-1.114		-0.554	-0.893	-0.977
	12	0.625	0.934		0.125	0.881	0.45
	24	1.027	1.252		0.532	0.931	0.647
	36	0.715	1.013		0.463	0.529	0.653
	48	1.491	1.47		0.457	1.109	0.198
	72	2.005	2.79		0.362	2.535	0.436
tail	0	0	0		0	0	0
	6	-0.054	0.117		-0.457	-0.014	0.031
	12	-0.12	0.391		-0.188	0.097	0.508
	24	-0.526	0.431		-0.465	-0.625	0.279
	36	-0.53	0.375		-0.326	-0.391	0.403
	48	2.079	2.133		0.453	1.603	0.657
	72	2.252	2.254		0.161	2.046	0.286
Single cell expression	1	Late epidermal progenitors-2	Late epidermal progenitors-2		spp-11+ neurons	Phagocytes (gut)	Late epidermal progenitors-2
	2	Neoblast-7	Neoblast-12		Neoblast-12	pgrn+-parencymal cells	Epidermis DVb
	3	Secretory-3	Activated early epidermal progenitors		Neoblast-10	ldlrr-1+ parenchymal cells	Late epidermal progenitors-1
